# Supplementary material for: Natural Gas Accumulation Characteristics in the Linxing Area, Ordos Basin, NW China: Revealed from the Integrated Study of Fluid Inclusions and Basin Modeling
Source: Hindawi journal article supplement (doi:10.1155/2020/8695497), 2020-08-25
Supplement: f1 [file 8695497.f1.docx]

Table S1. Sedimentary facies and paleo-water depths in the northeastern Ordos Basin

| Geologic Age | Late Carboniferous | Permian | Triassic | Early Cretaceous | Late Cretaceous |
| --- | --- | --- | --- | --- | --- |
| Sedimentary facies | Coastal plain facies | | Inland lacustrine facies | | Eolian loess facies |
| Paleo-water depth (m) | 25 | | 10 | | 0 |

Table S2. Coal sample parameters for basin modeling in the Linxing area

| Well | Depth (m) | Formation | Ro (%) | Ro detection number | TOC (%) | S1 (mg/g) | S2 (mg/g) | Tmax (℃) | HI (mg/g) |
| --- | --- | --- | --- | --- | --- | --- | --- | --- | --- |
| LX-1 | 2055.43 | P1t | 2.26 | 30 | 78.87 | 3.02 | 18.91 | 555 | 23.98 |
| 2079.92 | C2b | 2.29 | 25 | 70.30 | 2.89 | 20.50 | 557 | 29.16 |
| LX-2 | 1878.5 | P1s | 2.21 | 30 | 76.65 | 3.46 | 16.91 | 531 | 22.06 |
| 1931.67 | C2b | 2.25 | 22 | 67.23 | 3.07 | 18.21 | 533 | 27.09 |
| 1935.58 | C2b | 2.29 | 30 | 78.34 | 3.13 | 18.18 | 549 | 23.21 |
| LX-4 | 1752.92 | P1t | 2.25 | 25 | 69.05 | 3.30 | 17.74 | 542 | 25.69 |
| 1822.38 | C2b | 2.32 | 22 | 73.92 | 3.28 | 17.61 | 553 | 23.82 |
| LX-17 | 1822.64 | P1s | 2.65 | 30 | 49.56 | 1.57 | 5.11 | 510 | 10.31 |
| 1880.23 | P1t | 2.78 | 22 | 58.13 | 1.96 | 5.61 | 523 | 9.65 |
| LX-22 | 1893.63 | P1s | 2.68 | 23 | 50.44 | 0.99 | 5.48 | 507 | 10.86 |
| 1906.63 | P1t | 2.75 | 22 | 53.73 | 1.26 | 5.23 | 518 | 9.73 |
| LX-28 | 1928.61 | P1s | 1.13 | 28 | 49.60 | 1.40 | 53.00 | 463 | 106.85 |
| 1962.68 | P1t | 1.13 | 21 | 58.50 | 5.79 | 45.78 | 452 | 78.26 |
| LX-101 | 1649.32 | P1s | 1.17 | 26 | 74.80 | 7.24 | 153.31 | 462 | 204.96 |
| 1694.66 | P1t | 1.21 | 23 | 62.40 | 4.91 | 125.76 | 471 | 201.54 |


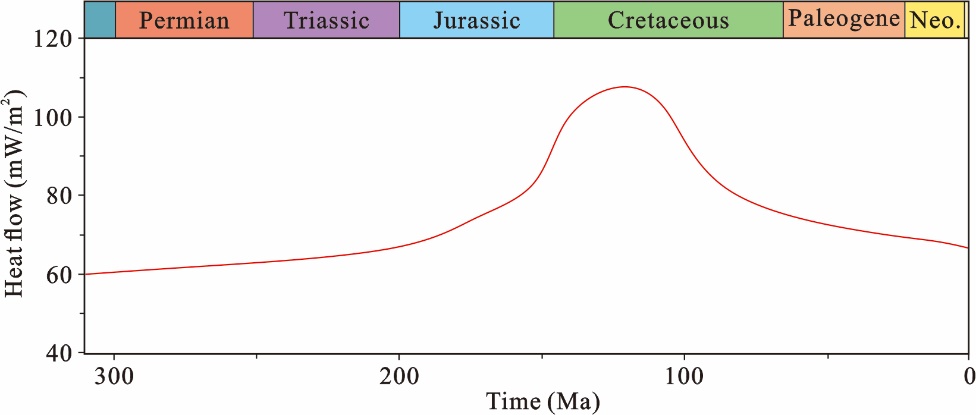


Figure S1. Evolution of paleo-heat flow in the northeastern Ordos Basin


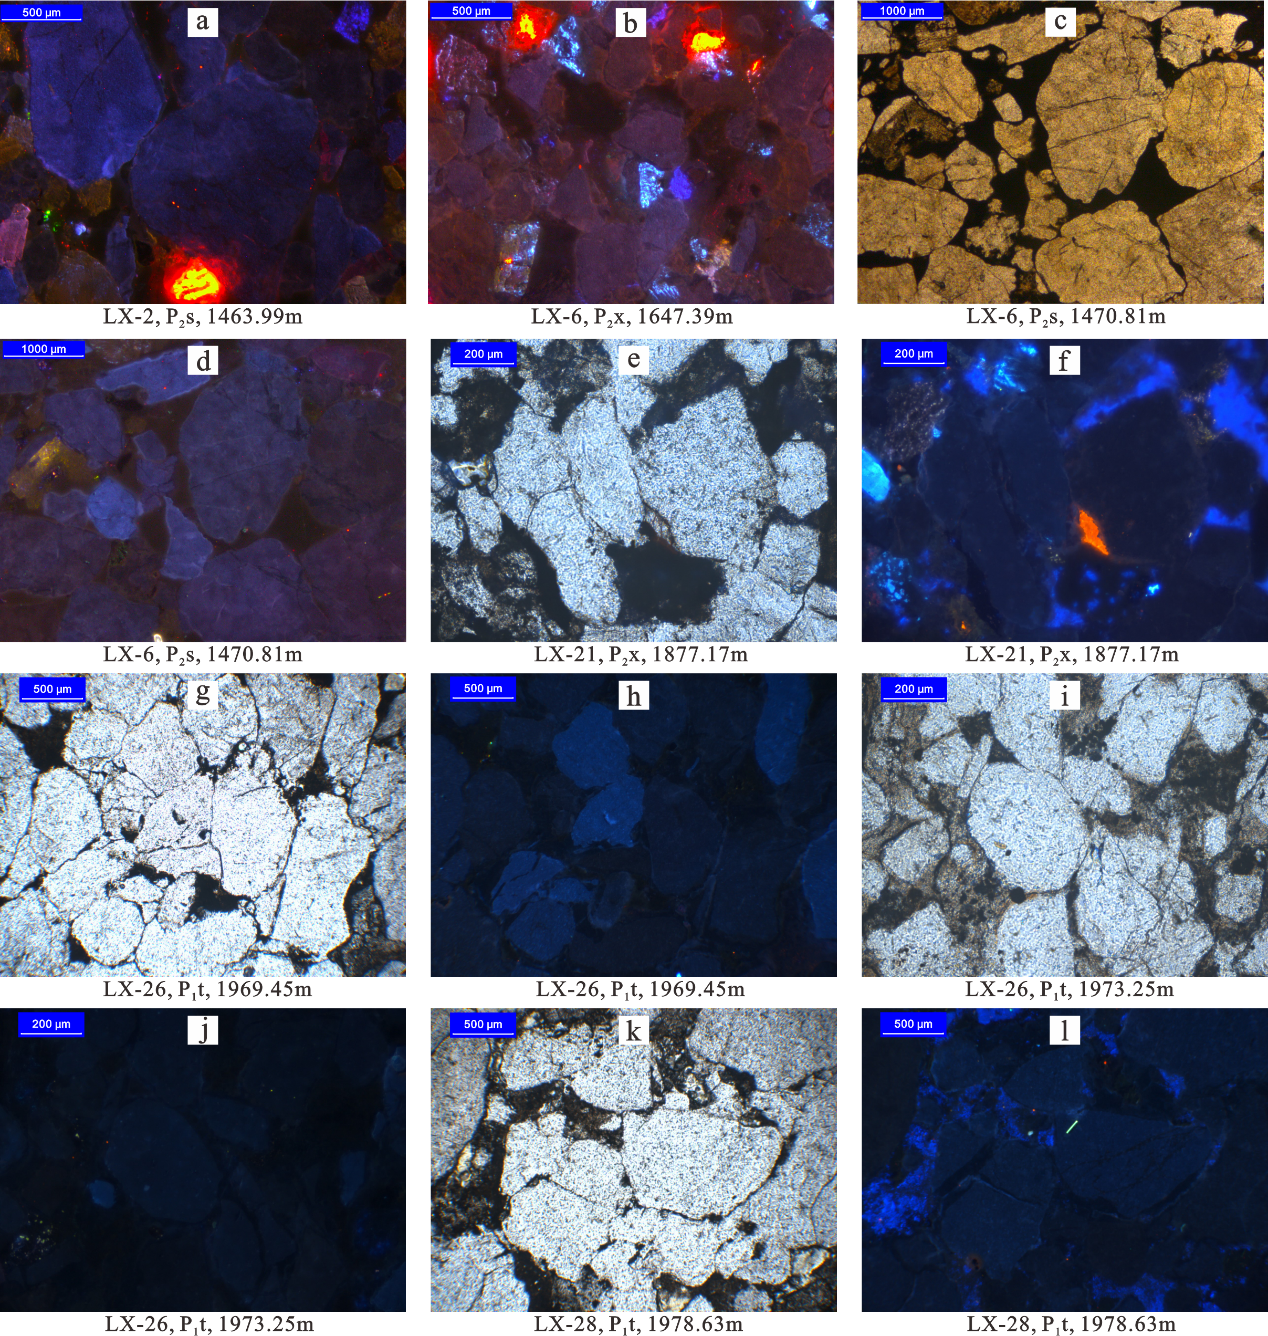


(a) and (b) are 2 cathode luminescence photographs, the clastic composition is mainly quartz which glows blue and dark-blue light, and a few glows reddish-brown light; the quartz overgrowth does not glow with weak development, only locally developed in a few particles; calcite glows orange light. (c) and (d) are plane polarized and cathode luminescence photographs of the same sample respectively, the quartz overgrowth is rarely developed. (e) and (f) are plane polarized and cathode luminescence photographs of the same sample respectively, the quartz overgrowth is locally developed. (g) and (h) are plane polarized and cathode luminescence photographs of the same sample respectively, the quartz overgrowth is relatively developed, and the broken and healed phenomenon of quartz particle can be seen. (i) and (j) are plane polarized and cathode luminescence photographs of the same sample respectively, the quartz overgrowth is locally developed, and the broken and healed phenomenon of quartz particle can be seen. (k) and (l) are plane polarized and cathode luminescence photographs of the same sample respectively, the quartz overgrowth is locally developed, and plagioclase glows yellow-green light.

Figure S2. Photographs of cathode luminescence scan in the Linxing area


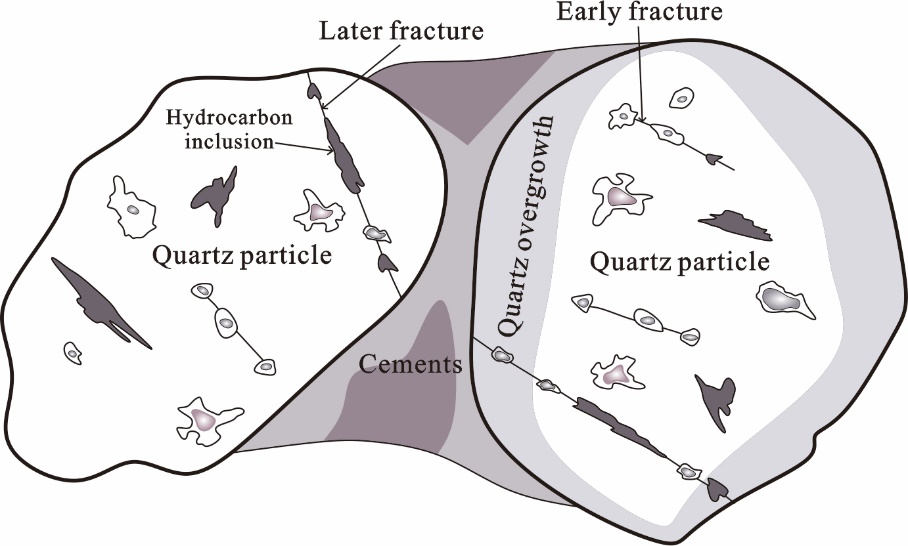


Figure S3. Schematic diagram of the petrography of the early and later inclusions


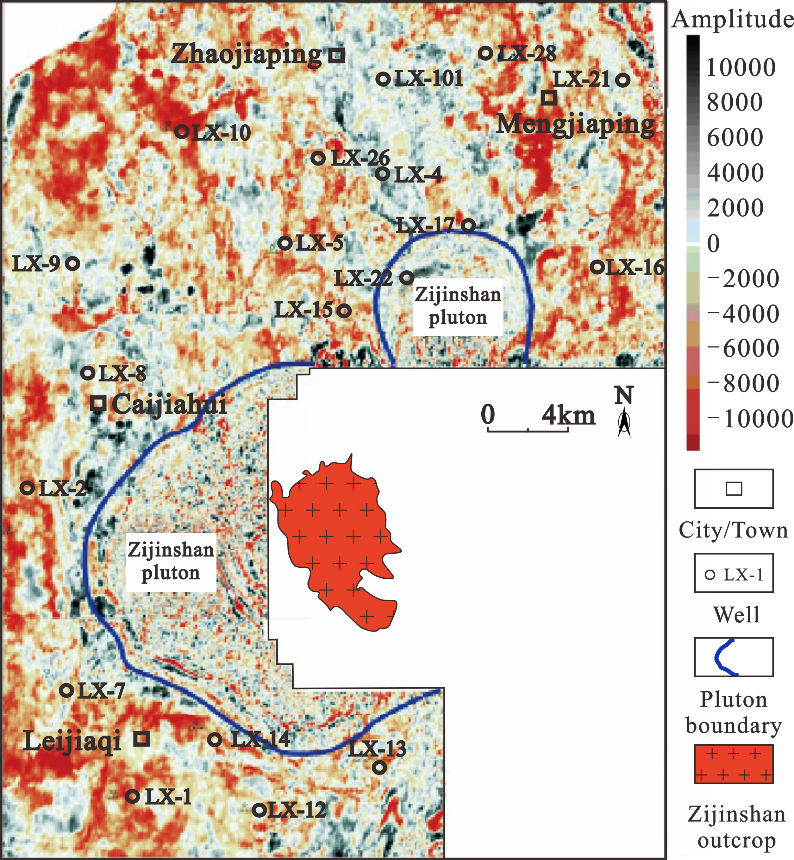


Figure S4. 1200ms seismic isochronic section in the Linxing area (cited from Zou et al., 2016)
